# Supplementary material for: Atomic-Scale Observation of Room and Low-Temperature Ultrasonic Properties of Advanced Materials ‘Tellurite Glasses’
Source: Research Square preprint supplement (doi:10.21203/rs.3.rs-1531068/v1), 2022-04-18
Supplement: Supplementary file 1 [file 50e16ac134110ce2cb514d71.xlsx]

## Sheet: Makishima - Maskenzie's
Compositions of (100-x)TeO2-xV2O5 glasses
X ( mol % )	(100-x)TeO2-xV2O5
	TeO2	V2O5
0	1	0
20	0.8	0.2
25	0.75	0.25
30	0.7	0.3
35	0.65	0.35
40	0.6	0.4
45	0.55	0.45
Makishima - Maskenzie's calculations
Molecular weight ( M )
Oxide		Molecular weight ( Mi ) ( g/mol )
TeO2	pbo	159.61
V2O5	B2O3	181.88
Oxide		Packing factor ( Vi ) ( cm3/mol )	Dissociation energy ( Gi ) ( Kcal/cm3 )
TeO2	pbo	14.7	17.14
V2O5	B2O3	35.6	7.57
X ( mol )	Density ( ρ ) ( g/cm3 )	Molecular weight ( M ) ( g/mol )	Molar volume ( VM ) ( cm3/mol )	Packing density ( Vt )	Dissociation energy per unit volume ( Gt ) ( GPa )	Young's modulus ( Eth ) ( GPa )	Bulk modulus ( Kth ) ( GPa )	Shear modulus ( Sth ) ( GPa )	Longitudinal modulus ( Lth ) ( GPa )	Poisson's ratio ( µth )
0	5.105	159.61	31.2654	0.470168	17.14	67.435	37.8893	29.9464	77.8179	0.204597
0.2	4.9	164.064	33.4824	0.563878	15.226	71.8443	48.4123	30.5662	89.1672	0.25369
0.25	4.62	165.178	35.7527	0.5573	14.7475	68.7748	45.8033	29.3331	84.9142	0.250783
0.3	4.5	166.291	36.9536	0.567469	14.269	67.7575	45.9492	28.7891	84.3347	0.255249
0.35	4.3	167.405	38.9313	0.565484	13.7905	65.2562	44.0981	27.7467	81.0937	0.254389
0.4	4.23	168.518	39.8388	0.578833	13.312	64.479	44.6016	27.2843	80.9806	0.260054
0.45	3.99	169.632	42.5142	0.566988	12.8335	60.8892	41.2565	25.8755	75.7571	0.255041
